# Supplementary material for: A multi-center survey on the postpartum mental health of mothers and attachment to their neonates during COVID-19 in Hubei Province of China
Source: PubMed Central journal article supplement — Ann Transl Med. 2021 Mar;9(5):382. doi: 10.21037/atm-20-6115 (PMC8033344; doi:10.21037/atm-20-6115), 2021-03
Supplement: atm-09-05-382-dss.pdf [file atm-09-05-382-dss.pdf]

## Data Sharing Statement

|                     |                                                                                                                                                    |                                                                                                                       |
|---------------------|----------------------------------------------------------------------------------------------------------------------------------------------------|-----------------------------------------------------------------------------------------------------------------------|
| <b>Article Info</b> | <a href="http://dx.doi.org/10.21037/atm-20-6115">http://dx.doi.org/10.21037/atm-20-6115</a>                                                        |                                                                                                                       |
| <b>Item</b>         | <b>Question</b>                                                                                                                                    | <b>Authors' Response<br/>(place "-" if not applicable)</b>                                                            |
| 1                   | Would you like to share data collected for your study to others?                                                                                   | Yes                                                                                                                   |
| 2                   | If not, would you like to share the reason for your decision?                                                                                      | -                                                                                                                     |
| 3                   | What data in particular will be shared?                                                                                                            | The data supporting the conclusions of this article can be made available from the corresponding author upon request. |
| 4                   | Any other documents will be share? Such as study protocol, statistical analysis plan, informed consent form, clinical study report, analytic code. | Study protocol and statistical analysis plan will also be shared if requested.                                        |
| 5                   | When will data availability begin?                                                                                                                 | From the publication date.                                                                                            |
| 6                   | When will data availability end?                                                                                                                   | Ten years within the publication date.                                                                                |
| 7                   | To whom will you share the data?                                                                                                                   | Neonatologists, gynecologists, health care workers and psychologists who are interested in our study.                 |
| 8                   | For what type of analysis or purpose?                                                                                                              | For analysis to evaluate the impact of COVID-19 on the maternal postpartum mental health.                             |
| 9                   | How or where can the data/documents be obtained?                                                                                                   | Emails could be sent to the address below to obtain the shared data:<br>shiwenzia66@163.com                           |
| 10                  | Any other restrictions?                                                                                                                            | Personal information and privacy of participants in the study are not available.                                      |
